# Supplementary material for: The Inflammatory Bowel Disease—Disk Tool for Assessing Disability in Inflammatory Bowel Disease Patients: Validation of the Greek Version
Source: MDPI journal article supplement (doi:10.3390/jcm12083023), 2023-04-21
Supplement: s1 [file s1]

**Table S1:** The table presents questions from the original English version of the IBD Disk and its final Greek translation

| English version                                                        |                                                                                                                                                                     | Ελληνική εκδοχή                                                             |                                                                                                                                                                                                    |
|------------------------------------------------------------------------|---------------------------------------------------------------------------------------------------------------------------------------------------------------------|-----------------------------------------------------------------------------|----------------------------------------------------------------------------------------------------------------------------------------------------------------------------------------------------|
| In the last week, because of my Crohn's disease or ulcerative colitis: |                                                                                                                                                                     | Την τελευταία εβδομάδα εξαιτίας της νόσου Crohn ή της ελκώδους κολίτιδας... |                                                                                                                                                                                                    |
| Abdominal pain                                                         | ...I have had aches or pains in my stomach or abdomen                                                                                                               | Κοιλιακό άλγος                                                              | ...Είχα πόνους στο στομάχι ή στην κοιλιά                                                                                                                                                           |
| Regulating defecation                                                  | ...I have had difficulty coordinating and managing defecation, including choosing and getting to an appropriate place for defecation and cleaning myself afterwards | Έλεγχος κενώσεων                                                            | ...Είχα δυσκολία στο να συντονίσω και να διαχειριστώ τις κενώσεις μου, όπως επίσης και στο να διαλέξω και να φτάσω σε ένα κατάλληλο μέρος για κένωση, καθώς και στο να καθαρίσω τον εαυτό μου μετά |
| Interpersonal interactions                                             | ...I have had difficulty with personal relationships and/or difficulty participating in the community                                                               | Διαπροσωπικές σχέσεις                                                       | ...Είχα δυσκολία στις προσωπικές μου σχέσεις και/ή δυσκολία συμμετοχής στο κοινωνικό περιβάλλον                                                                                                    |
| Education and work                                                     | ...I have had difficulty with school or studying activities, and/or difficulty with work or household activities                                                    | Εκπαίδευση και εργασία                                                      | ...Είχα δυσκολία στο σχολείο ή στις εκπαιδευτικές δραστηριότητες, και/ή δυσκολία στην εργασία ή στο νοικοκυριό                                                                                     |
| Sleep                                                                  | ...I have had difficulty sleeping, such as falling asleep, waking up frequently during the night or waking up too early in the morning                              | Ύπνος                                                                       | ...Είχα δυσκολία στον ύπνο, όπως στο να αποκοιμηθώ, σηκώνόμουν πολλές φορές κατά τη διάρκεια της νύχτας ή ξυπνούσα πολύ νωρίς το πρωί                                                              |
| Energy                                                                 | ...I have not felt rested and refreshed during the day, and have felt tired and without energy                                                                      | Ενεργητικότητα                                                              | ...Δεν έχω νιώσει ξεκούραστος ή ανανεωμένος κατά τη διάρκεια της ημέρας, και έχω νιώσει κουρασμένος και χωρίς ενέργεια                                                                             |
| Emotions                                                               | ...I have felt sad, low or depressed, and/or worried or anxious                                                                                                     | Συναίσθημα                                                                  | ...Έχω νιώσει λυπημένος, «πεσμένος» ή καταθλιπτικός, και/ή ανήσυχος ή αγχωμένος                                                                                                                    |
| Body image                                                             | ...I have not liked the way my body or body parts look                                                                                                              | Εικόνα σώματος                                                              | ...Δεν μου αρέσει το πως φαίνεται το σώμα μου ή σημεία του σώματός μου                                                                                                                             |
| Sexual functions                                                       | ...I have had difficulty with the mental and/or physical aspects of sex                                                                                             | Σεξουαλική λειτουργικότητα                                                  | ...Είχα δυσκολία με τις ψυχικές και/ή τις σωματικές πτυχές της σεξουαλικής επαφής                                                                                                                  |
| Joint pain                                                             | ...I have had pains in the joints of my body                                                                                                                        | Άλγος αρθρώσεων                                                             | ...Είχα πόνους στις αρθρώσεις του σώματός μου                                                                                                                                                      |

**Table S2:** Linear regression analysis for the association of clinical factors with the IBD-Disk total score (n=300)

|                                       | Univariate analysis |             |                   | Multivariate analysis |             |                   |
|---------------------------------------|---------------------|-------------|-------------------|-----------------------|-------------|-------------------|
|                                       | Coefficient         | 95%CI       | p-value           | Coefficient           | 95%CI       | p-value           |
| <b>Gender</b>                         |                     |             |                   |                       |             |                   |
| Male                                  | Ref.                |             |                   | Ref.                  |             | <b>&lt;0.001*</b> |
| Female                                | 14.87               | 9.95, 19.78 | <b>&lt;0.001*</b> | 12.66                 | 7.83, 17.48 |                   |
| <b>Age (years)</b>                    | -0.04               | -0.23, 0.15 | 0.681             |                       |             |                   |
| <b>Disease</b>                        |                     |             |                   |                       |             |                   |
| Crohn's disease                       | Ref.                |             |                   | Ref.                  |             | 0.289             |
| Ulcerative colitis                    | -4.18               | -9.65, 1.28 | <b>0.133</b>      | -2.71                 | -7.73, 2.31 |                   |
| <b>Disease duration(years)</b>        | 0.16                | -0.12, 0.45 | 0.252             |                       |             |                   |
| <b>Extraintestinal manifestations</b> |                     |             |                   |                       |             |                   |
| No                                    | Ref.                |             |                   |                       |             | <b>&lt;0.001*</b> |
| Yes                                   | 14.29               | 9.26, 19.33 | <b>&lt;0.001*</b> | 11.74                 | 6.82, 16.66 |                   |
| <b>Surgery</b>                        |                     |             |                   |                       |             |                   |
| No                                    | Ref.                |             |                   |                       |             |                   |
| Yes                                   | -1.39               | -9.37, 6.58 | 0.731             |                       |             |                   |

\*Statistically significant at level 0.05





**Table S5:** Univariate analysis for disease outbreak (events=30) from baseline to follow-up (n=269)

|                                                                                                                  | <b>OR</b> | <b>95% CI</b> | <b>p-value</b> | <b>OR</b> | <b>95% CI</b> | <b>p-value</b> |
|------------------------------------------------------------------------------------------------------------------|-----------|---------------|----------------|-----------|---------------|----------------|
| Change in Abdominal pain score from B to FU                                                                      | 0.85      | 0.73, 0.98    | <b>0.029*</b>  | 0.89      | 0.76, 1.04    | 0.140          |
| Change in Defecation score from B to FU                                                                          | 0.88      | 0.76, 1.02    | 0.094          |           |               |                |
| Change in Social life score from B to FU                                                                         | 0.90      | 0.79, 1.03    | 0.133          |           |               |                |
| Change in Professional life score from B to FU                                                                   | 0.86      | 0.75, 0.99    | <b>0.030*</b>  | 0.92      | 0.78, 1.07    | 0.265          |
| Change in Sleep score from B to FU                                                                               | 1.00      | 0.89, 1.13    | 0.956          |           |               |                |
| Change in Energy score from B to FU                                                                              | 0.87      | 0.77, 0.99    | <b>0.042*</b>  | 0.93      | 0.79, 1.09    | 0.355          |
| Change in Anxiety score from B to FU                                                                             | 0.97      | 0.84, 1.11    | 0.613          |           |               |                |
| Change in Self-image score from B to FU                                                                          | 0.89      | 0.78, 1.03    | 0.118          |           |               |                |
| Change in Sexual function score from B to FU                                                                     | 0.94      | 0.80, 1.09    | 0.382          |           |               |                |
| Change in Joint pain score from B to FU                                                                          | 0.89      | 0.78, 1.03    | 0.132          |           |               |                |
| OR: Odds ratio; CI: Confidence intervals; B: Baseline; FU: Follow-up<br>*Statistically significant at level 0.05 |           |               |                |           |               |                |

**Table S6:** Univariate analysis for disease outbreak (events=15) from baseline to follow-up in CD patients (n=199)

|                                                                                                                  | <b>OR</b> | <b>95% CI</b> | <b>p-value</b> |
|------------------------------------------------------------------------------------------------------------------|-----------|---------------|----------------|
| Change in Abdominal pain score from B to FU                                                                      | 0.83      | 0.69, 0.99    | <b>0.042*</b>  |
| Change in Defecation score from B to FU                                                                          | 0.83      | 0.68, 1.01    | 0.061          |
| Change in Social life score from B to FU                                                                         | 0.93      | 0.78, 1.12    | 0.433          |
| Change in Professional life score from B to FU                                                                   | 0.87      | 0.72, 1.04    | 0.113          |
| Change in Sleep score from B to FU                                                                               | 1.02      | 0.88, 1.19    | 0.781          |
| Change in Energy score from B to FU                                                                              | 0.89      | 0.74, 1.07    | 0.205          |
| Change in Anxiety score from B to FU                                                                             | 0.95      | 0.79, 1.14    | 0.581          |
| Change in Self-image score from B to FU                                                                          | 0.87      | 0.73, 1.04    | 0.117          |
| Change in Sexual function score from B to FU                                                                     | 0.89      | 0.74, 1.06    | 0.192          |
| Change in Joint pain score from B to FU                                                                          | 0.85      | 0.70, 1.03    | 0.094          |
| OR: Odds ratio; CI: Confidence intervals; B: Baseline; FU: Follow-up<br>*Statistically significant at level 0.05 |           |               |                |

**Table S7:** Univariate analysis for disease outbreak (events=15) from baseline to follow-up in UC patients (n=101)

|                                                                      | <b>OR</b> | <b>95% CI</b> | <b>p-value</b> |
|----------------------------------------------------------------------|-----------|---------------|----------------|
| Change in Abdominal pain score from B to FU                          | 0.84      | 0.61, 1.16    | 0.285          |
| Change in Defecation score from B to FU                              | 0.97      | 0.76, 1.25    | 0.827          |
| Change in Social life score from B to FU                             | 0.86      | 0.69, 1.05    | 0.144          |
| Change in Professional life score from B to FU                       | 0.85      | 0.69, 1.05    | 0.135          |
| Change in Sleep score from B to FU                                   | 0.97      | 0.78, 1.22    | 0.804          |
| Change in Energy score from B to FU                                  | 0.88      | 0.72, 1.07    | 0.195          |
| Change in Anxiety score from B to FU                                 | 1.01      | 0.81, 1.25    | 0.962          |
| Change in Self-image score from B to FU                              | 0.96      | 0.77, 1.19    | 0.725          |
| Change in Sexual function score from B to FU                         | 0.91      | 0.72, 1.15    | 0.443          |
| Change in Joint pain score from B to FU                              | 1.06      | 0.85, 1.33    | 0.594          |
| OR: Odds ratio; CI: Confidence intervals; B: Baseline; FU: Follow-up |           |               |                |
